# Supplementary material for: Overweight, obesity and the risk of LADA: results from a Swedish case–control study and the Norwegian HUNT Study
Source: PubMed Central journal article supplement (PMC6448998; doi:10.1007/s00125-018-4596-0), 2018-03-27
Supplement: 125_2018_4596_MOESM1_ESM.pdf [file 125_2018_4596_MOESM1_ESM.pdf]

**ESM Table 1** Characteristics of LADA patients by median GADA-level (196.0 U/ml).  
Results from ESTRID, 2010-2016

| Characteristics                    | LADA <sup>high</sup> | LADA <sup>low</sup> | <i>p</i>          |
|------------------------------------|----------------------|---------------------|-------------------|
| Number of individuals              | 197                  | 197                 |                   |
| Men, %                             | 48.7                 | 57.9                | <i>0.0691</i>     |
| Age, years, mean (SD)              | 57.4 (12.6)          | 60.3 (11.9)         | <i>0.0220</i>     |
| BMI, kg/m <sup>2</sup> , mean (SD) | 27.3 (5.0)           | 29.0 (5.4)          | <i>0.0017</i>     |
| Any first-degree FHD, %            | 44.2                 | 44.7                | <i>0.9192</i>     |
| FHD-T2D, %                         | 34.5                 | 38.6                | <i>0.4026</i>     |
| FHD-T1D, %                         | 12.7                 | 7.6                 | <i>0.0953</i>     |
| With insulin treatment, %          | 51.0                 | 32.8                | <i>0.0003</i>     |
| C-peptide, nmol/l, median (IQR)    | 0.56 (0.50)          | 0.90 (0.82)         | <i>&lt;0.0001</i> |
| HOMA-B, median (IQR)               | 23.2 (44.4)          | 46.8 (53.3)         | <i>&lt;0.0001</i> |
| HOMA-IR, median (IQR)              | 2.30 (2.4)           | 3.10 (2.5)          | <i>0.0017</i>     |
| HOMA-S, median (IQR)               | 44.0 (36.5)          | 32.1 (24.6)         | <i>0.0017</i>     |
| High-risk HLA, % <sup>a</sup>      | 70.1                 | 53.8                | <i>0.0012</i>     |
| Low-risk HLA, % <sup>b</sup>       | 12.5                 | 30.7                | <i>&lt;0.0001</i> |

<sup>a</sup> Genetic information was available for 93.9 %

T1D, type 1 diabetes; T2D, type 2 diabetes

**ESM Table 2** Overweight/obesity and LADA, by sex. Results from ESTRID 2010–2016 and HUNT 1984–2008

| Variable                                                | All                                       |           |                                | Men                                       |           |                                | Women                                     |           |                                |
|---------------------------------------------------------|-------------------------------------------|-----------|--------------------------------|-------------------------------------------|-----------|--------------------------------|-------------------------------------------|-----------|--------------------------------|
|                                                         | No. control participants/<br>person-years | No. Cases | OR/HR <sup>a</sup><br>(95% CI) | No. control participants/<br>person-years | No. Cases | OR/HR <sup>a</sup><br>(95% CI) | No. control participants/<br>person-years | No. Cases | OR/HR <sup>a</sup><br>(95% CI) |
| <b>ESTRID</b>                                           |                                           |           |                                |                                           |           |                                |                                           |           |                                |
| BMI (kg/m <sup>2</sup> )                                |                                           |           |                                |                                           |           |                                |                                           |           |                                |
| <25                                                     | 777                                       | 125       | 1                              | 292                                       | 63        | 1                              | 485                                       | 62        | 1                              |
| 25-29.9                                                 | 671                                       | 165       | 1.38 (1.06, 1.80)              | 400                                       | 96        | 1.01 (0.70, 1.46)              | 271                                       | 69        | 1.83 (1.24, 2.71)              |
| ≥30                                                     | 256                                       | 135       | 2.93 (2.17, 3.97)              | 128                                       | 72        | 2.45 (1.60, 3.76)              | 128                                       | 63        | 3.32 (2.13, 5.16)              |
| Per 1 kg/m <sup>2</sup> increase                        | 1704                                      | 425       | 1.10 (1.07, 1.13)              | 820                                       | 231       | 1.08 (1.04, 1.12)              | 884                                       | 194       | 1.12 (1.08, 1.16)              |
| Per 1 kg/m <sup>2</sup> increase since age 20           | 1412                                      | 339       | 1.10 (1.07, 1.14)              | 678                                       | 187       | 1.08 (1.03, 1.12)              | 734                                       | 152       | 1.11 (1.06, 1.17)              |
| <b>HUNT</b>                                             |                                           |           |                                |                                           |           |                                |                                           |           |                                |
| BMI (kg/m <sup>2</sup> )                                |                                           |           |                                |                                           |           |                                |                                           |           |                                |
| <25                                                     | 494,231                                   | 26        | 1                              | 207,861                                   | 12        | 1                              | 286,370                                   | 14        | 1                              |
| 25-29.9                                                 | 401,641                                   | 64        | 2.16 (1.36, 3.43)              | 221,579                                   | 38        | 2.29 (1.19, 4.41)              | 180,062                                   | 26        | 2.07 (1.07, 4.02)              |
| ≥30                                                     | 117,085                                   | 57        | 6.07 (3.76, 9.78)              | 44,488                                    | 21        | 5.92 (2.88, 12.17)             | 72,597                                    | 36        | 6.37 (3.34, 12.13)             |
| Per 1 kg/m <sup>2</sup> increase                        | 1,012,957                                 | 147       | 1.16 (1.13, 1.20)              | 473,928                                   | 71        | 1.19 (1.12, 1.25)              | 539,029                                   | 76        | 1.15 (1.11, 1.20)              |
| Per 1 kg/m <sup>2</sup> increase over time <sup>b</sup> | 359,732                                   | 48        | 1.18 (1.03, 1.34)              | 166,660                                   | 24        | 1.20 (0.96, 1.50)              | 193,072                                   | 24        | 1.16 (0.99, 1.36)              |
| WHR <sup>c</sup>                                        |                                           |           |                                |                                           |           |                                |                                           |           |                                |
| <0.85 (W), <0.90 (M)                                    | 329,347                                   | 27        | 1                              | 117,406                                   | 10        | 1                              | 211,941                                   | 17        | 1                              |
| ≥0.85 (W), ≥0.90 (M)                                    | 134,323                                   | 24        | 1.89 (1.03, 3.46)              | 96,438                                    | 16        | 1.67 (0.74, 3.77)              | 37,885                                    | 8         | 2.19 (0.93, 5.15)              |
| WHtR <sup>c</sup>                                       |                                           |           |                                |                                           |           |                                |                                           |           |                                |
| <0.50                                                   | 229,054                                   | 11        | 1                              | 80,924                                    | 4         | 1                              | 148,130                                   | 7         | 1                              |
| ≥0.50                                                   | 234,035                                   | 40        | 3.14 (1.56, 6.30)              | 132,737                                   | 22        | 3.01 (1.01, 8.94)              | 101,298                                   | 18        | 3.22 (1.31, 7.92)              |

<sup>a</sup> ORs (ESTRID) and HRs (HUNT) adjusted for age, sex, FHD, smoking and physical activity

<sup>b</sup> Change in BMI from HUNT1 (1984-1986) until baseline in HUNT2 (1995-1997)

<sup>c</sup> Information only available from baseline at HUNT2 (1995-1997)

M, men; No., number; W, women

**ESM Table 3** Overweight/obesity and Type 2 diabetes, by sex. Results from ESTRID 2010–2016 and HUNT 1984–2008

| Variable                                                | All                                       |           |                                | Men                                       |           |                                | Women                                     |           |                                |
|---------------------------------------------------------|-------------------------------------------|-----------|--------------------------------|-------------------------------------------|-----------|--------------------------------|-------------------------------------------|-----------|--------------------------------|
|                                                         | No. control participants/<br>person-years | No. Cases | OR/HR <sup>a</sup><br>(95% CI) | No. control participants/<br>person-years | No. Cases | OR/HR <sup>a</sup><br>(95% CI) | No. control participants/<br>person-years | No. Cases | OR/HR <sup>a</sup><br>(95% CI) |
| <b>ESTRID</b>                                           |                                           |           |                                |                                           |           |                                |                                           |           |                                |
| BMI (kg/m <sup>2</sup> )                                |                                           |           |                                |                                           |           |                                |                                           |           |                                |
| <25                                                     | 777                                       | 101       | 1                              | 292                                       | 60        | 1                              | 485                                       | 41        | 1                              |
| 25-29.9                                                 | 671                                       | 590       | 5.14 (3.99, 6.61)              | 400                                       | 389       | 4.12 (2.92, 5.81)              | 271                                       | 201       | 7.13 (4.85, 10.48)             |
| ≥30                                                     | 256                                       | 729       | 18.88 (14.29, 24.94)           | 128                                       | 414       | 14.97 (10.12, 22.14)           | 128                                       | 315       | 25.29 (16.73, 38.21)           |
| Per 1 kg/m <sup>2</sup> increase                        | 1704                                      | 1420      | 1.29 (1.26, 1.32)              | 820                                       | 863       | 1.27 (1.23, 1.31)              | 884                                       | 557       | 1.30 (1.26, 1.35)              |
| Per 1 kg/m <sup>2</sup> increase since age 20           | 1412                                      | 1103      | 1.27 (1.23, 1.30)              | 678                                       | 670       | 1.22 (1.17, 1.26)              | 734                                       | 433       | 1.32 (1.27, 1.38)              |
| <b>HUNT</b>                                             |                                           |           |                                |                                           |           |                                |                                           |           |                                |
| BMI (kg/m <sup>2</sup> )                                |                                           |           |                                |                                           |           |                                |                                           |           |                                |
| <25                                                     | 494,231                                   | 238       | 1                              | 207,861                                   | 129       | 1                              | 286,370                                   | 109       | 1                              |
| 25-29.9                                                 | 401,641                                   | 915       | 3.30 (2.86, 3.81)              | 221,579                                   | 553       | 2.97 (2.45, 3.61)              | 180,062                                   | 362       | 3.70 (2.98, 4.60)              |
| ≥30                                                     | 117,085                                   | 849       | 9.83 (8.49, 11.38)             | 44,488                                    | 373       | 8.89 (7.26, 10.89)             | 72,597                                    | 476       | 10.77 (8.69, 13.35)            |
| Per 1 kg/m <sup>2</sup> increase                        | 1,012,957                                 | 2002      | 1.19 (1.18, 1.20)              | 473,928                                   | 1055      | 1.22 (1.20, 1.24)              | 539,029                                   | 947       | 1.17 (1.16, 1.18)              |
| Per 1 kg/m <sup>2</sup> increase over time <sup>b</sup> | 359,732                                   | 943       | 1.22 (1.18, 1.25)              | 166,660                                   | 493       | 1.29 (1.23, 1.35)              | 193,072                                   | 450       | 1.18 (1.14, 1.22)              |
| WHR <sup>c</sup>                                        |                                           |           |                                |                                           |           |                                |                                           |           |                                |
| <0.85 (W), <0.90 (M)                                    | 329,347                                   | 388       | 1                              | 117,406                                   | 126       | 1                              | 211,941                                   | 262       | 1                              |
| ≥0.85 (W), ≥0.90 (M)                                    | 134,323                                   | 650       | 3.57 (3.11, 4.09)              | 96,438                                    | 418       | 3.08 (2.52, 3.78)              | 37,885                                    | 232       | 3.95 (3.30, 4.74)              |
| WHtR <sup>c</sup>                                       |                                           |           |                                |                                           |           |                                |                                           |           |                                |
| <0.50                                                   | 229,054                                   | 134       | 1                              | 80,924                                    | 50        | 1                              | 148,130                                   | 84        | 1                              |
| ≥0.50                                                   | 234,035                                   | 903       | 5.08 (4.21, 6.12)              | 132,737                                   | 494       | 4.31 (3.21, 5.79)              | 101,298                                   | 409       | 5.53 (4.34, 7.03)              |

<sup>a</sup> ORs (ESTRID) and HRs (HUNT) adjusted for age, sex, FHD, smoking and physical activity

<sup>b</sup> Change in BMI from HUNT1 (1984-1986) until baseline in HUNT2 (1995-1997)

<sup>c</sup> Information only available from baseline at HUNT2 (1995-1997)

M, men; No., number; W, women

**ESM Table 4** Characteristics of LADA patients by BMI category. Results from ESTRID, 2010-2016

| Characteristics                              | BMI<25      | BMI 25-29.9 | BMI ≥30     | <i>p</i> <sup>a</sup> |
|----------------------------------------------|-------------|-------------|-------------|-----------------------|
| Number of individuals                        | 125         | 165         | 135         |                       |
| Women, %                                     | 50.4        | 58.2        | 53.3        | 0.6362                |
| Age, years, mean (SD)                        | 58.2 (13.4) | 60.4 (12.0) | 57.9 (11.4) | 0.8182                |
| Any first-degree FHD, %                      | 46.4        | 41.8        | 48.2        | 0.7779                |
| FHD-T2D, %                                   | 35.2        | 34.6        | 40.7        | 0.3580                |
| FHD-T1D, %                                   | 16.8        | 9.1         | 8.9         | 0.0555                |
| With insulin treatment, %                    | 65.3        | 38.0        | 22.6        | <0.0001               |
| C-peptide, nmol/l, median (IQR) <sup>b</sup> | 0.37 (0.40) | 0.72 (0.54) | 1.10 (0.76) | <0.0001               |
| GADA, U/ml, median (IQR)                     | 250 (171)   | 195 (217)   | 51 (232)    | <0.0001               |
| HOMA-IR, median (IQR) <sup>b</sup>           | 1.90 (1.20) | 2.55 (2.80) | 3.70 (2.20) | <0.0001               |
| HOMA-β, median (IQR) <sup>b</sup>            | 18.7 (35.6) | 33.0 (48.9) | 56.1 (61.5) | <0.0001               |
| HOMA-S, median (IQR) <sup>b</sup>            | 52.7 (30.8) | 39.4 (32.5) | 27.3 (18.8) | <0.0001               |
| High-risk HLA, % <sup>c</sup>                | 64.1        | 62.5        | 57.5        | 0.2980                |
| Low-risk HLA, % <sup>c</sup>                 | 12.8        | 22.4        | 30.0        | 0.0013                |

<sup>a</sup> *p* for difference between BMI<25 and BMI ≥30

<sup>b</sup> Clinical information was available for 92.7 %

<sup>c</sup> Genetic information was available for 91.5 %

T1D, type 1 diabetes; T2D, type 2 diabetes

**ESM Table 5** Characteristics of LADA patients by BMI category. Results from HUNT, 1984-2008

| Characteristics                              | BMI<25      | BMI 25-29.9   | BMI ≥30      | <i>p</i> <sup>a</sup> |
|----------------------------------------------|-------------|---------------|--------------|-----------------------|
| Number of individuals                        | 26          | 64            | 57           |                       |
| Women, %                                     | 53.9        | 40.6          | 63.2         | 0.4214                |
| Age, years, mean (SD) <sup>b</sup>           | 49.4 (12.2) | 54.9 (10.7)   | 56.2 (10.8)  | 0.0130                |
| Age at onset, years, mean (SD)               | 56.9 (12.9) | 59.9 (10.4)   | 61.4 (11.0)  | 0.1091                |
| WHR, mean (SD) <sup>c</sup>                  | 0.82 (0.10) | 0.88 (0.05)   | 0.90 (0.06)  | 0.0168                |
| Any first-degree FHD, %                      | 38.5        | 54.7          | 45.6         | 0.5420                |
| With insulin treatment, %                    | 33.3        | 17.2          | 8.9          | 0.0180                |
| C-peptide, nmol/l, median (IQR) <sup>d</sup> | 0.16 (0.45) | 0.56 (0.66)   | 0.89 (0.95)  | 0.0003                |
| GADA, U/ml, median (IQR)                     | 215 (413.9) | 120.9 (451.5) | 80.6 (559.0) | 0.2082                |
| HOMA-IR, median (IQR) <sup>d</sup>           | 1.50 (1.90) | 1.80 (1.25)   | 2.50 (2.00)  | 0.1820                |
| HOMA-β, median (IQR) <sup>d</sup>            | 36.8 (43.2) | 55.8 (31.2)   | 76.3 (80.4)  | 0.2118                |
| HOMA-S, median (IQR) <sup>d</sup>            | 65.6 (65.5) | 55.7 (46.9)   | 40.7 (36.1)  | 0.1644                |

<sup>a</sup>*p* for difference between BMI<25 and BMI ≥30

<sup>b</sup>Age at baseline

<sup>c</sup>Information only available from baseline at HUNT2 (1995-1997)

<sup>d</sup>Clinical information was available for 80.3 %

T1D, type 1 diabetes; T2D, type 2 diabetes
